# Supplementary material for: Nanograined thermoelectric Bi2Te2.7Se0.3 with ultralow phonon transport prepared from chemically exfoliated nanoplatelets
Source: Royal Society of Chemistry journal article supplement (doi:10.1039/c3ta12623d), 2013-01-01
Supplement: c3ta12623d.pdf [file c3ta12623d.pdf]

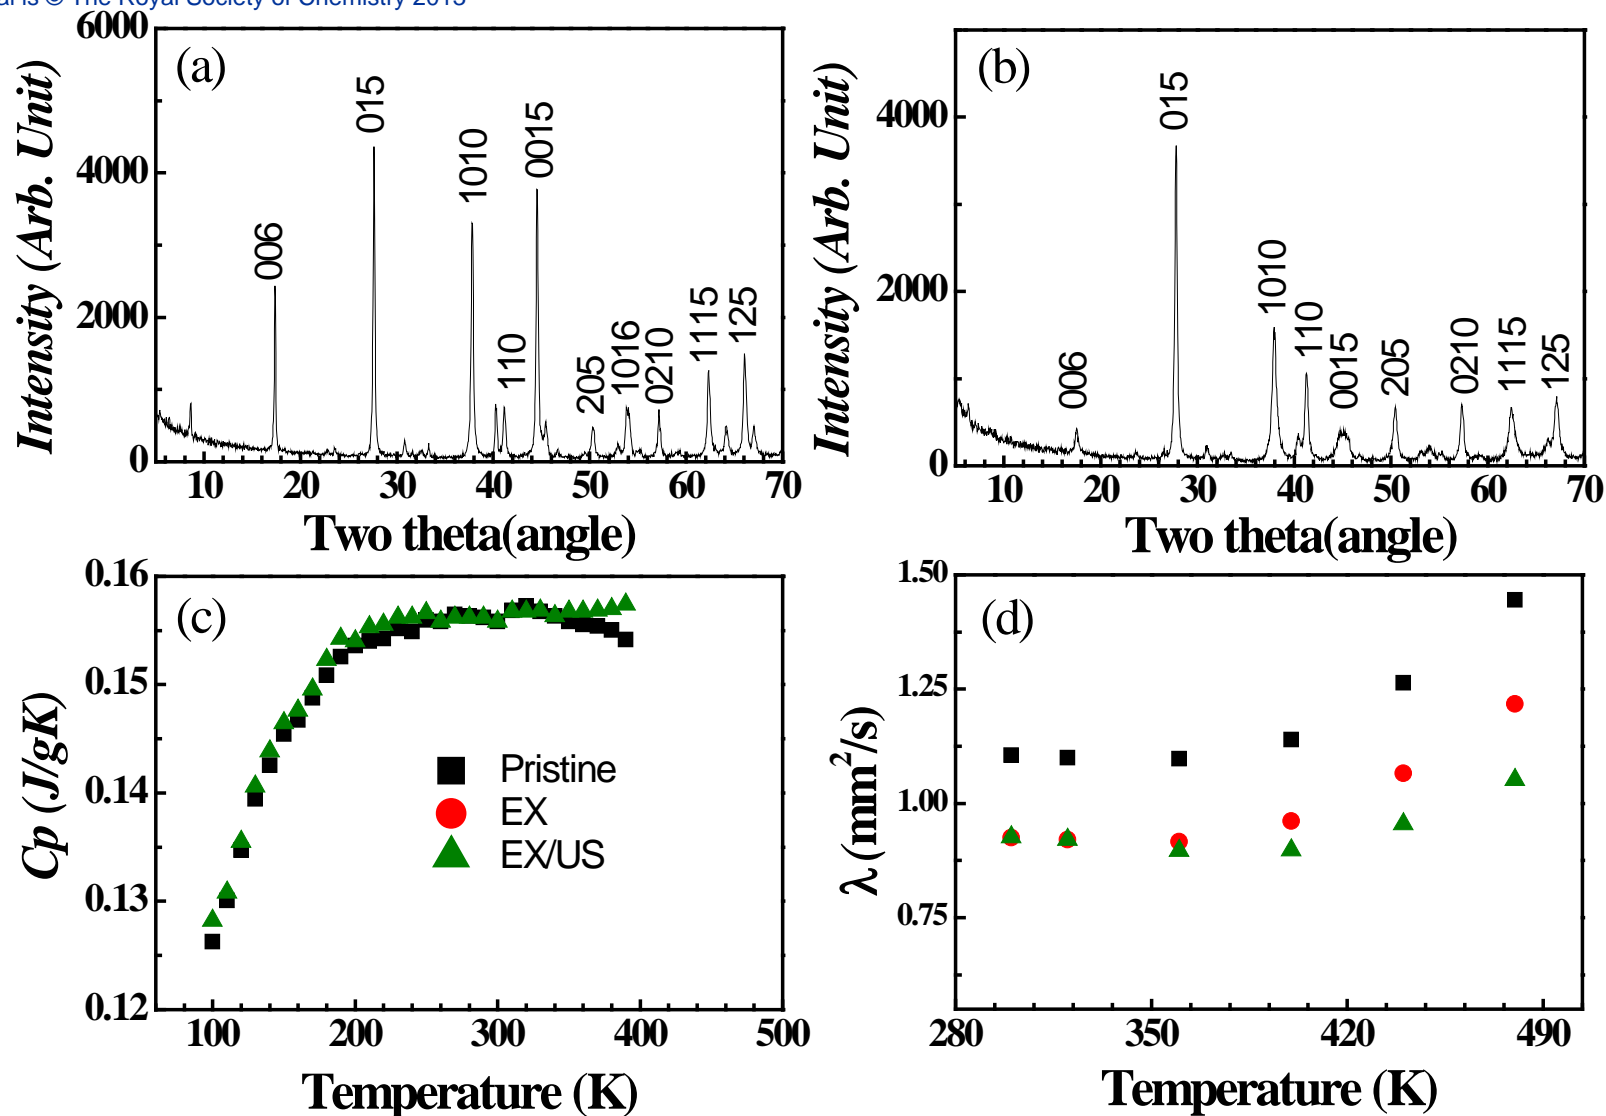

Figure S1. XRD pattern of sintered EX/US sample (a) in parallel direction, (b) in perpendicular direction to press direction. (c) Heat capacity ( $C_p$ ) values for pristine and EX/US. (d) Thermal diffusivity values for pristine, EX, and EX/US.

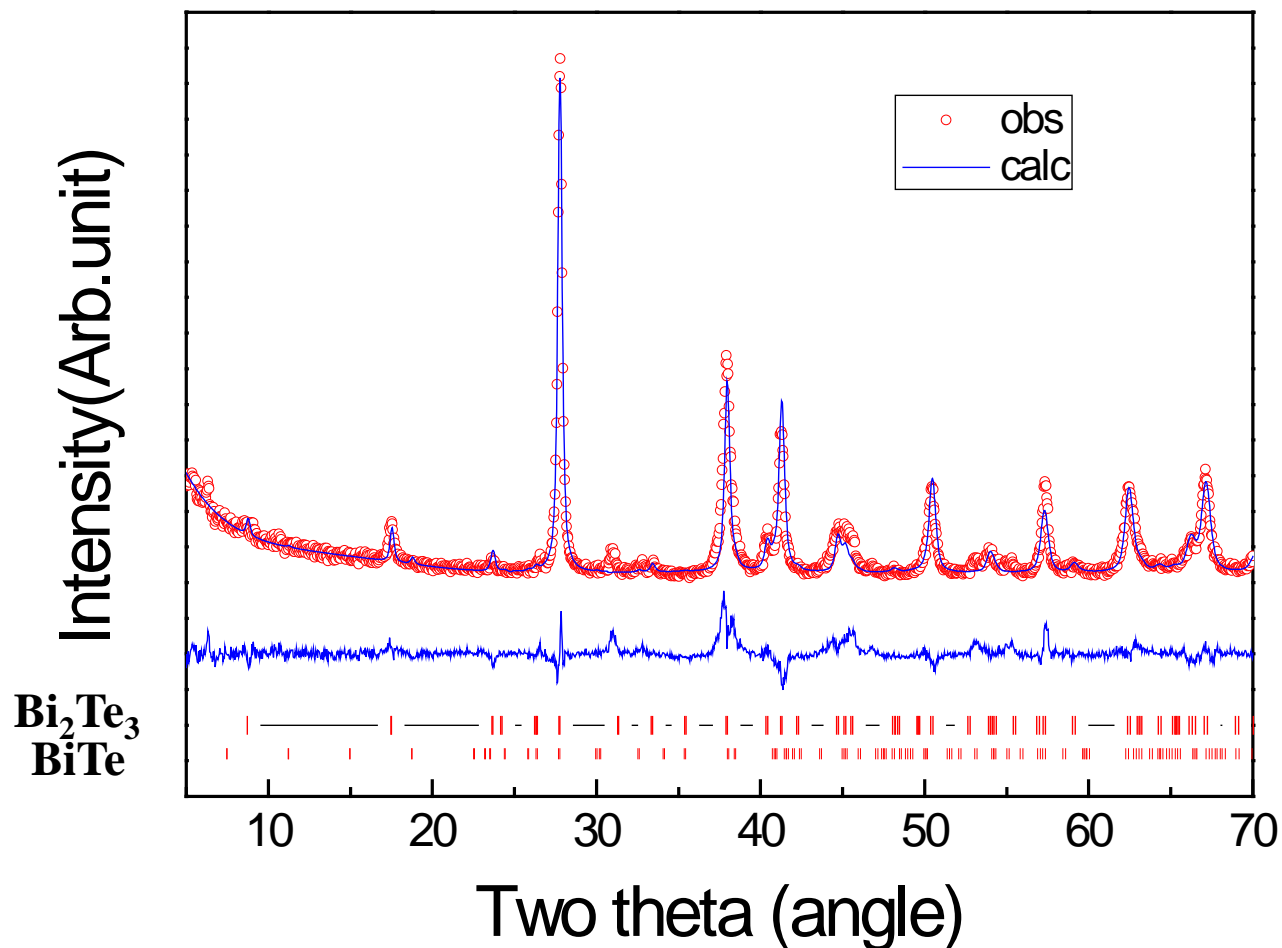

Figure S2. Reitveld refinement result of sintered EX/US sample in perpendicular direction to press direction. Weight and molar fractions ( $\text{Bi}_2\text{Te}_3$ :  $\text{BiTe}$ ) are calculated to be 92.02%:7.91% and 93.62%:6.38%, respectively. Reliability factors, goodness-of-fit indicator, and Durbin-Watson statistic are as follows;  $R_{wp} = 19.077$ ,  $R_p = 14.025$ ,  $R_R = 29.371$ ,  $R_e = 6.700$ ,  $S = 2.8473$ ,  $d1 = 0.5532$ ,  $d2 = 0.3515$ ; For  $\text{Bi}_2\text{Te}_3$ :  $R_B = 9.792$ ,  $R_F = 5.821$ ,  $R_F^2 = 2.404$ ,  $E(\text{SCIO}) = 1252.08$ ; For  $\text{BiTe}$ ,  $R_B = 16.524$ ,  $R_F = 7.916$ ,  $R_F^2 = 7.310$ ,  $E(\text{SCIO}) = 1267.32$ .
